# Supplementary material
Source: HighWire-hosted journal article supplement (https://erj.ersjournals.com/content/58/3/2101372)
Supplement: inline-supplementary-material-1 [file inline-supplementary-material-1.pdf]

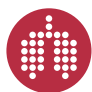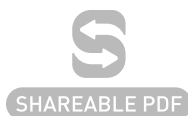

# The role of cigarette smoking-derived pollutants in the risk of mortality in idiopathic pulmonary fibrosis

Taro Yasuma <sup>1</sup>, Corina N. D'Alessandro-Gabazza <sup>1</sup>, Osamu Hataji<sup>2</sup>, Tetsu Kobayashi<sup>3</sup> and Esteban C. Gabazza <sup>1</sup>

<sup>1</sup>Dept of Immunology, Mie University Faculty and Graduate School of Medicine, and Mie University Hospital, Tsu, Japan. <sup>2</sup>Respiratory Center, Matsusaka Municipal Hospital, Matsusaka, Japan. <sup>3</sup>Dept of Pulmonary and Critical Care Medicine, Mie University Faculty and Graduate School of Medicine, and Mie University Hospital, Tsu, Japan.

Esteban C. Gabazza ([gabazza@doc.medic.mie-u.ac.jp](mailto:gabazza@doc.medic.mie-u.ac.jp))

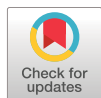

Shareable abstract (@ERSpublications)

**The role of pollutants derived from cigarette smoke in the mortality of patients with pulmonary fibrosis** <https://bit.ly/3pbuPDc>

**Cite this article as:** Yasuma T, D'Alessandro-Gabazza CN, Hataji O, *et al.* The role of cigarette smoking-derived pollutants in the risk of mortality in idiopathic pulmonary fibrosis. *Eur Respir J* 2021; 58: 2101372 [DOI: 10.1183/13993003.01372-2021].

This single-page version can be shared freely online.

Copyright ©The authors 2021. For reproduction rights and permissions contact [permissions@ersnet.org](mailto:permissions@ersnet.org)

Received: 15 May 2021  
Accepted: 28 May 2021

## To the Editor:

We read with great interest the work reported by YOON *et al.* [1]. The authors found that a high concentration of nitrogen dioxide at an individual's residential address is significantly associated with increased mortality in idiopathic pulmonary fibrosis (IPF) patients when all confounders are included in the health analysis model. However, an important question that remains unclear in the study is whether active or passive cigarette smoking-associated release of nitrogen dioxide or particulate matter plays a role in the clinical outcome of IPF patients.
